# Supplementary material for: Comparative Phylogenomics of Pathogenic and Nonpathogenic Species
Source: Oxford University Press journal article supplement (doi:10.1534/g3.115.022806), 2015-12-03
Supplement: 022806_figures1.pdf [file 022806_figures1.pdf]

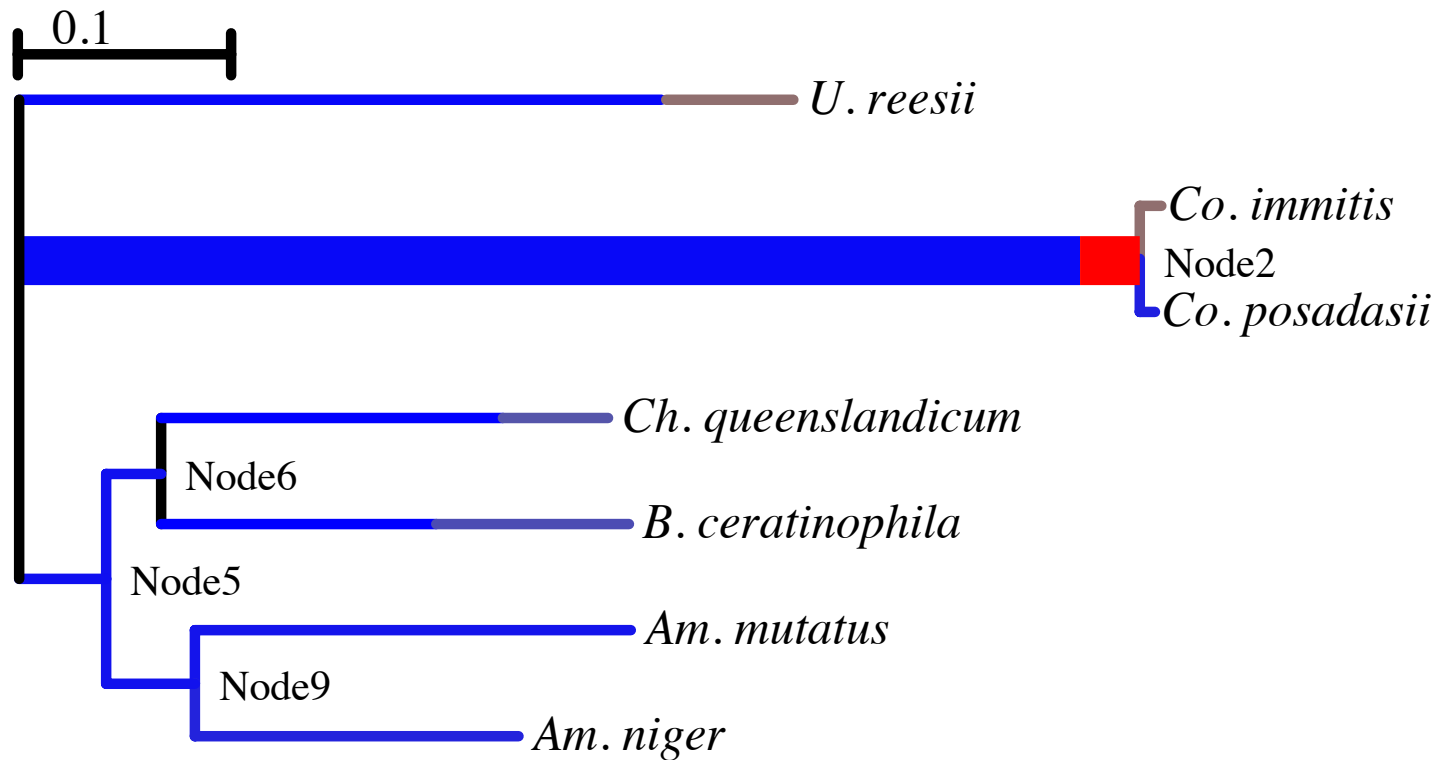

**Figure S1.** Representative episodic selection tree generated in HyPhy (KOSAKOVSKY POND *et al.* 2011) for the CIMG\_11422 ortholog group, which shows positive selection (indicated in red) at the *Coccidioides* branch.
