# Supplementary material for: Comparative Phylogenomics of Pathogenic and Nonpathogenic Species
Source: Oxford University Press journal article supplement (doi:10.1534/g3.115.022806), 2015-12-03
Supplement: 022806_tables1.pdf [file 022806_tables1.pdf]

**Table S1.** Summary of all Pfam domain categories showing evidence of changes in gene family size.

| DESCRIPTION                                    | ID              | Ncra | Asfum | Asnid | Pbra | Hcap | Mgyp | Trub | Uree | Cimm | Cpos | Amut | Anig | Bcer | Cque | Tree-wide BH_Pval * |
|------------------------------------------------|-----------------|------|-------|-------|------|------|------|------|------|------|------|------|------|------|------|---------------------|
| 'chromo' (CHR)romatin Organisation MOdifier)   | Chromo          | 10   | 8     | 5     | 6    | 10   | 9    | 4    | 5    | 11   | 6    | 7    | 6    | 7    | 12   | 0.0184              |
| 2OG-Fe(II) oxygenase superfamily               | 2OG-FeII_Oxy    | 8    | 16    | 22    | 8    | 6    | 10   | 7    | 9    | 12   | 8    | 17   | 18   | 12   | 13   | 0.0184              |
| 3-beta hydroxysteroid dehydrogenase/isomeras   | 3Beta_HSD       | 7    | 17    | 13    | 3    | 5    | 6    | 7    | 3    | 6    | 7    | 31   | 29   | 25   | 29   | 0.0000              |
| 3-hydroxyacyl-CoA dehydrogenase, C-terminal    | 3HCDH           | 4    | 3     | 5     | 2    | 1    | 1    | 1    | 1    | 2    | 2    | 3    | 2    | 1    | 4    | 0.0307              |
| 3-hydroxyacyl-CoA dehydrogenase, NAD binding   | 3HCDH_N         | 7    | 10    | 12    | 3    | 3    | 4    | 5    | 7    | 5    | 6    | 14   | 19   | 13   | 24   | 0.0000              |
| 3-Oxoacyl-[acyl-carrier-protein (ACP)] synth   | ACP_syn_III_C   | 0    | 0     | 1     | 1    | 0    | 1    | 1    | 1    | 1    | 1    | 3    | 6    | 0    | 7    | 0.0000              |
| 3-Oxoacyl-[acyl-carrier-protein (ACP)] synth   | ACP_syn_III     | 2    | 1     | 4     | 1    | 1    | 2    | 1    | 3    | 4    | 3    | 6    | 8    | 4    | 9    | 0.0000              |
| 4-hydroxyphenylacetate 3-hydroxylase family    | HpaB            | 0    | 0     | 0     | 0    | 0    | 0    | 0    | 0    | 0    | 0    | 1    | 2    | 1    | 4    | 0.0307              |
| 4Fe-4S binding domain                          | Fer4            | 3    | 2     | 2     | 2    | 2    | 2    | 2    | 1    | 2    | 2    | 4    | 3    | 1    | 6    | 0.0307              |
| 7 transmembrane receptor (rhodopsin family)    | 7tm_1           | 0    | 0     | 0     | 2    | 2    | 0    | 1    | 0    | 1    | 1    | 5    | 2    | 5    | 1    | 0.0000              |
| A-macroglobulin complement component           | A2M_comp        | 0    | 1     | 0     | 0    | 0    | 0    | 0    | 0    | 0    | 0    | 3    | 0    | 1    | 2    | 0.0184              |
| ABC transporter                                | ABC_tran        | 48   | 61    | 65    | 39   | 40   | 56   | 49   | 44   | 49   | 47   | 89   | 69   | 78   | 82   | 0.0000              |
| ABC-2 type transporter                         | ABC2_membrane   | 8    | 15    | 19    | 8    | 9    | 9    | 6    | 8    | 8    | 9    | 16   | 9    | 12   | 13   | 0.0000              |
| Acetyltransferase (GNAT) family                | Acetyltransf_1  | 31   | 45    | 44    | 25   | 30   | 38   | 35   | 38   | 41   | 39   | 54   | 39   | 45   | 48   | 0.0000              |
| Acyl transferase domain                        | Acyl_transf_1   | 10   | 19    | 37    | 6    | 4    | 21   | 13   | 11   | 13   | 12   | 27   | 17   | 14   | 26   | 0.0000              |
| Acyl-CoA dehydrogenase, C-terminal domain      | Acyl-CoA_dh_1   | 9    | 10    | 17    | 12   | 11   | 10   | 10   | 12   | 13   | 12   | 22   | 25   | 19   | 26   | 0.0000              |
| Acyl-CoA dehydrogenase, middle domain          | Acyl-CoA_dh_M   | 9    | 12    | 17    | 16   | 8    | 10   | 10   | 15   | 15   | 14   | 22   | 26   | 21   | 28   | 0.0000              |
| Acyl-CoA reductase (LuxC)                      | LuxC            | 0    | 1     | 0     | 0    | 0    | 1    | 1    | 1    | 0    | 0    | 3    | 5    | 2    | 7    | 0.0000              |
| Adaptin N terminal region                      | Adaptin_N       | 8    | 8     | 8     | 8    | 10   | 8    | 8    | 8    | 8    | 8    | 25   | 17   | 18   | 23   | 0.0000              |
| Adenovirus IVa2 protein                        | Adeno_IVa2      | 0    | 0     | 0     | 0    | 0    | 0    | 0    | 0    | 0    | 0    | 4    | 0    | 1    | 0    | 0.0000              |
| Aflatoxin regulatory protein                   | AFIR            | 0    | 1     | 3     | 0    | 0    | 0    | 0    | 0    | 1    | 1    | 3    | 0    | 0    | 3    | 0.0000              |
| AhpC/TSA family                                | AhpC-TSA        | 9    | 12    | 12    | 7    | 7    | 8    | 6    | 4    | 6    | 5    | 10   | 13   | 11   | 18   | 0.0000              |
| AlG2-like family                               | AlG2            | 1    | 3     | 5     | 1    | 0    | 1    | 1    | 4    | 3    | 3    | 2    | 5    | 7    | 4    | 0.0000              |
| Alanine dehydrogenase/PNT, C-terminal domain   | AlaDh_PNT_C     | 10   | 9     | 11    | 5    | 4    | 5    | 7    | 7    | 6    | 6    | 12   | 14   | 11   | 23   | 0.0000              |
| Alcohol dehydrogenase GroES-like domain        | ADH_N           | 29   | 53    | 68    | 23   | 21   | 29   | 24   | 27   | 23   | 24   | 47   | 32   | 37   | 43   | 0.0000              |
| Aldehyde dehydrogenase family                  | Aldedh          | 14   | 23    | 28    | 13   | 12   | 14   | 13   | 14   | 14   | 14   | 24   | 24   | 18   | 23   | 0.0307              |
| Aldo/keto reductase family                     | Aldo_ket_red    | 18   | 30    | 40    | 11   | 13   | 15   | 13   | 17   | 15   | 15   | 19   | 23   | 20   | 16   | 0.0000              |
| alpha/beta hydrolase fold                      | Abhydrolase_1   | 42   | 51    | 49    | 28   | 26   | 37   | 36   | 28   | 33   | 32   | 39   | 36   | 37   | 38   | 0.0307              |
| alpha/beta hydrolase fold                      | Abhydrolase_3   | 21   | 37    | 50    | 18   | 11   | 22   | 19   | 14   | 20   | 19   | 32   | 26   | 26   | 25   | 0.0000              |
| Amidohydrolase family                          | Amidohydro_3    | 10   | 9     | 13    | 4    | 5    | 4    | 4    | 4    | 5    | 4    | 7    | 8    | 3    | 6    | 0.0450              |
| Amidohydrolase family                          | Amidohydro_1    | 9    | 10    | 14    | 4    | 5    | 6    | 6    | 5    | 5    | 4    | 9    | 8    | 3    | 7    | 0.0000              |
| Amino acid permease                            | AA_permease     | 17   | 40    | 51    | 18   | 18   | 30   | 32   | 28   | 29   | 28   | 48   | 39   | 34   | 42   | 0.0000              |
| Aminotransferase class I and II                | Aminotran_1_2   | 16   | 30    | 26    | 18   | 16   | 27   | 23   | 19   | 21   | 21   | 37   | 35   | 26   | 36   | 0.0000              |
| AMP-binding enzyme                             | AMP-binding     | 27   | 51    | 68    | 38   | 42   | 51   | 46   | 43   | 39   | 42   | 62   | 59   | 50   | 56   | 0.0000              |
| Archaeal ATPase                                | Arch_ATPase     | 1    | 2     | 3     | 1    | 0    | 2    | 2    | 2    | 2    | 2    | 45   | 31   | 30   | 32   | 0.0000              |
| ArgK protein                                   | ArgK            | 1    | 0     | 0     | 0    | 0    | 0    | 0    | 1    | 1    | 1    | 25   | 13   | 16   | 25   | 0.0000              |
| Armadillo/beta-catenin-like repeat             | Arm             | 16   | 19    | 21    | 15   | 15   | 15   | 15   | 10   | 16   | 17   | 21   | 13   | 21   | 17   | 0.0000              |
| ATP-grasp domain                               | ATP-grasp_3     | 0    | 2     | 1     | 1    | 2    | 2    | 0    | 1    | 3    | 3    | 11   | 12   | 10   | 16   | 0.0450              |
| ATP-grasp domain                               | ATP-grasp       | 6    | 5     | 6     | 4    | 4    | 3    | 4    | 5    | 5    | 5    | 9    | 14   | 9    | 16   | 0.0000              |
| ATP-utilising chromatin assembly and remodel   | WAC_Acf1_DNA_bd | 2    | 1     | 1     | 1    | 2    | 1    | 1    | 0    | 1    | 1    | 2    | 1    | 0    | 3    | 0.0307              |
| ATPase family associated with various cellu    | AAA_5           | 46   | 47    | 42    | 45   | 65   | 53   | 45   | 38   | 44   | 41   | 77   | 64   | 68   | 64   | 0.0000              |
| ATPase family associated with various cellu    | AAA             | 59   | 52    | 53    | 48   | 74   | 52   | 48   | 48   | 51   | 49   | 97   | 83   | 86   | 80   | 0.0000              |
| Bacterial alpha-L-rhamnosidase                 | Bac_rhamnosid   | 1    | 4     | 9     | 0    | 0    | 0    | 0    | 0    | 0    | 0    | 0    | 1    | 1    | 2    | 0.0000              |
| Bacterial protein of unknown function (DUF894) | DUF894          | 0    | 0     | 1     | 0    | 0    | 0    | 0    | 0    | 0    | 0    | 1    | 5    | 5    | 0    | 0.0000              |
| Bacterial protein of unknown function (DUF965) | DUF965          | 0    | 0     | 0     | 0    | 0    | 0    | 0    | 0    | 0    | 0    | 0    | 1    | 2    | 0    | 0.0307              |
| Bacterial SH3 domain                           | SH3_3           | 0    | 2     | 0     | 0    | 0    | 1    | 0    | 0    | 0    | 0    | 2    | 1    | 0    | 2    | 0.0184              |
| Bacterial transferase hexapeptide (three rep   | Hexapep         | 9    | 10    | 11    | 8    | 7    | 7    | 9    | 6    | 7    | 8    | 11   | 5    | 9    | 9    | 0.0307              |
| Bacteriophage lysis protein                    | Phage_lysis     | 0    | 0     | 0     | 0    | 0    | 0    | 0    | 0    | 0    | 0    | 0    | 1    | 2    | 0    | 0.0307              |
| BCS1 N terminal                                | BCS1_N          | 3    | 3     | 3     | 1    | 20   | 2    | 3    | 2    | 1    | 2    | 5    | 5    | 1    | 1    | 0.0000              |
| BED zinc finger                                | zf-BED          | 0    | 1     | 0     | 0    | 0    | 0    | 0    | 0    | 1    | 0    | 4    | 1    | 2    | 3    | 0.0307              |
| Berberine and berberine like                   | BBE             | 12   | 14    | 24    | 3    | 5    | 11   | 12   | 3    | 4    | 4    | 5    | 10   | 4    | 9    | 0.0000              |
| Beta-ketoacyl synthase, C-terminal domain      | Ketoacyl-synt_C | 9    | 17    | 38    | 5    | 2    | 22   | 13   | 9    | 12   | 13   | 30   | 20   | 13   | 24   | 0.0000              |
| Beta-ketoacyl synthase, N-terminal domain      | ketoacyl-synt   | 10   | 22    | 40    | 6    | 4    | 23   | 15   | 10   | 15   | 15   | 34   | 25   | 21   | 34   | 0.0000              |
| Beta-lactamase                                 | Beta-lactamase  | 6    | 6     | 8     | 4    | 3    | 8    | 6    | 7    | 5    | 6    | 12   | 4    | 5    | 6    | 0.0000              |
| Beta-satellite pathogenicity beta C1 protein   | Pathogen_betaC1 | 0    | 0     | 0     | 0    | 0    | 0    | 0    | 0    | 0    | 0    | 2    | 0    | 0    | 2    | 0.0184              |
| BT1 family                                     | BT1             | 0    | 2     | 0     | 0    | 0    | 0    | 0    | 0    | 0    | 0    | 2    | 1    | 3    | 0    | 0.0000              |
| BTB/POZ domain                                 | BTB             | 14   | 5     | 10    | 9    | 11   | 11   | 8    | 12   | 13   | 11   | 14   | 23   | 18   | 15   | 0.0000              |
| bZIP transcription factor                      | bZIP_1          | 18   | 24    | 24    | 15   | 19   | 18   | 17   | 22   | 23   | 19   | 32   | 25   | 24   | 28   | 0.0307              |
| Carbamoyl-phosphate synthase L chain, ATP bi   | CPSase_L_D2     | 6    | 7     | 8     | 7    | 6    | 5    | 5    | 7    | 6    | 6    | 14   | 15   | 11   | 20   | 0.0184              |
| Carbamoyl-phosphate synthase L chain, N-term   | CPSase_L_chain  | 5    | 6     | 8     | 7    | 6    | 5    | 5    | 6    | 6    | 6    | 8    | 10   | 8    | 15   | 0.0184              |
| Carboxylesterase                               | COesterase      | 12   | 20    | 27    | 7    | 4    | 12   | 12   | 4    | 6    | 6    | 13   | 12   | 8    | 10   | 0.0000              |

|                                              |                 |    |     |     |    |    |    |    |    |    |    |    |    |    |    |        |
|----------------------------------------------|-----------------|----|-----|-----|----|----|----|----|----|----|----|----|----|----|----|--------|
| Carboxymuconolactone decarboxylase family    | CMD             | 1  | 2   | 3   | 2  | 1  | 1  | 1  | 2  | 2  | 2  | 7  | 4  | 3  | 7  | 0.0184 |
| Caspase domain                               | Peptidase_C14   | 2  | 2   | 3   | 1  | 1  | 3  | 2  | 1  | 1  | 1  | 1  | 5  | 8  | 5  | 0.0184 |
| CDR ABC transporter                          | PDR_CDR         | 4  | 12  | 15  | 5  | 5  | 6  | 3  | 5  | 5  | 5  | 9  | 5  | 8  | 9  | 0.0184 |
| Cellulase (glycosyl hydrolase family 5)      | Cellulase       | 5  | 11  | 14  | 2  | 3  | 1  | 2  | 2  | 1  | 1  | 5  | 5  | 4  | 7  | 0.0184 |
| CENP-B N-terminal DNA-binding domain         | CENP-B_N        | 0  | 4   | 1   | 1  | 1  | 0  | 0  | 0  | 1  | 1  | 3  | 1  | 3  | 2  | 0.0307 |
| Centromere protein B dimerisation domain     | Cenp-B_dimeris  | 0  | 0   | 0   | 0  | 0  | 0  | 0  | 0  | 0  | 0  | 2  | 0  | 1  | 0  | 0.0307 |
| Centromere protein H (CENP-H)                | CENP-H          | 0  | 0   | 1   | 0  | 0  | 0  | 0  | 0  | 0  | 0  | 0  | 2  | 0  | 2  | 0.0000 |
| CFEM domain                                  | CFEM            | 13 | 3   | 7   | 6  | 3  | 7  | 6  | 7  | 10 | 8  | 14 | 8  | 12 | 15 | 0.0000 |
| Chitin recognition protein                   | Chitin_bind_1   | 4  | 6   | 10  | 1  | 2  | 12 | 7  | 5  | 3  | 3  | 8  | 7  | 5  | 9  | 0.0000 |
| Choline/ethanolamine kinase                  | Choline_kinase  | 2  | 4   | 2   | 3  | 4  | 12 | 15 | 9  | 8  | 9  | 28 | 91 | 58 | 74 | 0.0000 |
| Chordopoxvirus fusion protein                | Vac_Fusion      | 0  | 0   | 0   | 0  | 0  | 0  | 0  | 0  | 0  | 0  | 0  | 1  | 0  | 2  | 0.0307 |
| Citrate synthase                             | Citrate_synt    | 4  | 5   | 3   | 2  | 2  | 2  | 2  | 2  | 2  | 2  | 9  | 3  | 4  | 3  | 0.0000 |
| CoA-transferase family III                   | CoA_transf_3    | 4  | 5   | 6   | 4  | 2  | 2  | 2  | 5  | 6  | 6  | 7  | 8  | 5  | 12 | 0.0000 |
| Cobalamin biosynthesis protein CobT          | CobT            | 0  | 0   | 0   | 0  | 0  | 0  | 0  | 0  | 0  | 0  | 0  | 1  | 2  | 0  | 0.0307 |
| Cobalamin synthesis protein cobW C-terminal  | CobW_C          | 1  | 2   | 2   | 0  | 1  | 2  | 2  | 2  | 1  | 1  | 3  | 1  | 1  | 4  | 0.0307 |
| CobW/HypB/UreG, nucleotide-binding domain    | cobW            | 7  | 8   | 9   | 8  | 8  | 7  | 7  | 6  | 9  | 9  | 27 | 17 | 19 | 22 | 0.0000 |
| Collagen triple helix repeat (20 copies)     | Collagen        | 1  | 3   | 4   | 1  | 0  | 0  | 1  | 0  | 0  | 0  | 0  | 1  | 0  | 1  | 0.0307 |
| Common central domain of tyrosinase          | Tyrosinase      | 8  | 3   | 10  | 6  | 7  | 1  | 1  | 5  | 3  | 3  | 4  | 2  | 2  | 5  | 0.0000 |
| Condensation domain                          | Condensation    | 3  | 15  | 19  | 4  | 6  | 18 | 15 | 13 | 7  | 9  | 18 | 19 | 12 | 16 | 0.0000 |
| Copper amine oxidase, N2 domain              | Cu_amine_oxidN2 | 1  | 6   | 5   | 0  | 2  | 1  | 2  | 5  | 6  | 6  | 7  | 5  | 5  | 7  | 0.0000 |
| CorA-like Mg2+ transporter protein           | CorA            | 11 | 6   | 11  | 8  | 6  | 6  | 6  | 4  | 5  | 5  | 11 | 8  | 7  | 10 | 0.0307 |
| Core histone H2A/H2B/H3/H4                   | Histone         | 13 | 10  | 10  | 22 | 10 | 9  | 11 | 9  | 19 | 11 | 15 | 14 | 17 | 19 | 0.0000 |
| Cupin                                        | Cupin_1         | 2  | 4   | 9   | 1  | 0  | 3  | 3  | 1  | 2  | 3  | 3  | 4  | 5  | 6  | 0.0000 |
| Cyclopropane-fatty-acyl-phospholipid synthas | CMA5            | 5  | 3   | 5   | 0  | 2  | 3  | 3  | 3  | 3  | 2  | 20 | 16 | 11 | 14 | 0.0184 |
| Cys/Met metabolism PLP-dependent enzyme      | Cys_Met_Meta_PP | 7  | 10  | 6   | 6  | 6  | 7  | 7  | 8  | 7  | 8  | 16 | 22 | 14 | 21 | 0.0000 |
| Cytochrome P450                              | p450            | 41 | 74  | 117 | 34 | 38 | 67 | 61 | 41 | 43 | 42 | 78 | 49 | 55 | 65 | 0.0000 |
| D-ala D-ala ligase C-terminus                | Dala_Dala_lig_C | 1  | 3   | 1   | 1  | 4  | 5  | 2  | 2  | 3  | 2  | 12 | 13 | 11 | 19 | 0.0000 |
| D-aminoacylase, C-terminal region            | D-aminoacyl_C   | 0  | 0   | 0   | 0  | 0  | 0  | 0  | 0  | 0  | 0  | 1  | 0  | 2  | 0  | 0.0307 |
| D-isomer specific 2-hydroxyacid dehydrogenas | 2-Hacid_dh      | 9  | 10  | 16  | 8  | 8  | 8  | 8  | 7  | 11 | 9  | 14 | 11 | 9  | 13 | 0.0184 |
| D-isomer specific 2-hydroxyacid dehydrogenas | 2-Hacid_dh_C    | 11 | 14  | 20  | 8  | 9  | 10 | 9  | 8  | 12 | 10 | 22 | 26 | 22 | 28 | 0.0000 |
| DDE superfamily endonuclease                 | DDE             | 0  | 48  | 3   | 13 | 0  | 0  | 1  | 0  | 2  | 5  | 1  | 2  | 0  | 1  | 0.0000 |
| DEAD/DEAH box helicase                       | DEAD            | 52 | 51  | 48  | 42 | 53 | 50 | 47 | 46 | 48 | 48 | 94 | 76 | 96 | 95 | 0.0184 |
| DegT/DnrI/EryC1/Str5 aminotransferase family | DegT_DnrI_EryC1 | 3  | 4   | 1   | 2  | 1  | 3  | 3  | 2  | 2  | 2  | 15 | 16 | 10 | 16 | 0.0000 |
| Dehydrogenase E1 component                   | E1_dh           | 3  | 5   | 3   | 3  | 4  | 3  | 3  | 4  | 4  | 4  | 5  | 7  | 6  | 11 | 0.0450 |
| DeoR-like helix-turn-helix domain            | HTH_DeoR        | 0  | 0   | 0   | 0  | 0  | 0  | 0  | 0  | 1  | 1  | 1  | 4  | 0  | 1  | 0.0184 |
| Deuterolysin metalloprotease (M35) family    | Peptidase_M35   | 3  | 3   | 4   | 1  | 1  | 5  | 5  | 5  | 9  | 9  | 7  | 3  | 4  | 7  | 0.0000 |
| DivIVA protein                               | DivIVA          | 0  | 0   | 0   | 0  | 1  | 0  | 0  | 0  | 0  | 0  | 2  | 0  | 1  | 0  | 0.0184 |
| DJ-1/Pfpl family                             | DJ-1_Pfpl       | 4  | 8   | 5   | 4  | 5  | 4  | 4  | 2  | 4  | 3  | 10 | 3  | 5  | 6  | 0.0000 |
| DNA methylase                                | Ng_N4_Mtase     | 0  | 0   | 0   | 0  | 0  | 0  | 0  | 0  | 0  | 0  | 1  | 0  | 3  | 0  | 0.0184 |
| Domain of Unknown Function (DUF1087)         | DUF1087         | 0  | 13  | 0   | 0  | 0  | 0  | 0  | 0  | 0  | 0  | 2  | 0  | 2  | 0  | 0.0000 |
| Domain of unknown function (DUF2467)         | DUF2467         | 10 | 17  | 24  | 9  | 7  | 6  | 6  | 6  | 5  | 6  | 13 | 11 | 14 | 12 | 0.0000 |
| Elongation factor Tu GTP binding domain      | GTP_EFTU        | 18 | 17  | 18  | 16 | 16 | 16 | 16 | 16 | 16 | 17 | 64 | 60 | 54 | 71 | 0.0000 |
| Endonuclease/Exonuclease/phosphatase family  | Exo_endo_phos   | 14 | 27  | 9   | 9  | 11 | 9  | 9  | 9  | 10 | 10 | 12 | 10 | 17 | 13 | 0.0000 |
| Endoribonuclease L-PSP                       | Ribonuc_L-PSP   | 3  | 6   | 12  | 3  | 3  | 4  | 5  | 4  | 4  | 4  | 5  | 6  | 5  | 11 | 0.0000 |
| Enoyl-CoA hydratase/isomerase family         | ECH             | 7  | 12  | 15  | 14 | 13 | 10 | 9  | 11 | 14 | 12 | 17 | 21 | 14 | 23 | 0.0000 |
| Equine arteritis virus serine endopeptidase  | Peptidase_S32   | 0  | 0   | 0   | 0  | 0  | 0  | 0  | 1  | 0  | 0  | 2  | 0  | 0  | 5  | 0.0000 |
| Ergosterol biosynthesis ERG4/ERG24 family    | ERG4_ERG24      | 4  | 6   | 3   | 3  | 4  | 6  | 5  | 2  | 4  | 4  | 5  | 2  | 6  | 3  | 0.0184 |
| Esterase PHB depolymerase                    | Esterase_phd    | 4  | 4   | 2   | 0  | 0  | 0  | 0  | 0  | 1  | 2  | 2  | 0  | 0  | 0  | 0.0307 |
| Eukaryotic aspartyl protease                 | Asp             | 17 | 7   | 10  | 5  | 5  | 6  | 6  | 5  | 4  | 4  | 8  | 6  | 7  | 10 | 0.0307 |
| Eukaryotic cytochrome b561                   | Cytochrom_B561  | 1  | 1   | 0   | 1  | 0  | 1  | 1  | 1  | 1  | 1  | 1  | 3  | 0  | 3  | 0.0000 |
| FAD binding domain                           | FAD_binding_2   | 25 | 41  | 62  | 15 | 13 | 22 | 14 | 22 | 24 | 23 | 47 | 50 | 34 | 62 | 0.0000 |
| FAD binding domain                           | FAD_binding_4   | 22 | 32  | 48  | 11 | 15 | 20 | 19 | 12 | 16 | 16 | 17 | 20 | 11 | 18 | 0.0000 |
| FAD binding domain                           | FAD_binding_3   | 33 | 48  | 82  | 15 | 18 | 32 | 22 | 23 | 21 | 21 | 52 | 46 | 29 | 58 | 0.0000 |
| FAD dependent oxidoreductase                 | DAO             | 55 | 86  | 116 | 35 | 33 | 47 | 41 | 44 | 48 | 46 | 85 | 83 | 67 | 93 | 0.0000 |
| FAD-binding domain                           | FAD_binding_8   | 10 | 18  | 10  | 7  | 9  | 8  | 8  | 7  | 7  | 8  | 13 | 8  | 7  | 9  | 0.0000 |
| Ferric reductase like transmembrane componen | Ferric_reduct   | 10 | 17  | 10  | 7  | 13 | 8  | 8  | 8  | 8  | 8  | 10 | 7  | 7  | 10 | 0.0000 |
| Ferritin-like domain                         | Ferritin        | 0  | 0   | 0   | 0  | 0  | 0  | 0  | 0  | 0  | 0  | 0  | 1  | 0  | 2  | 0.0307 |
| FG-GAP repeat                                | FG-GAP          | 0  | 2   | 5   | 0  | 0  | 0  | 0  | 0  | 0  | 0  | 3  | 0  | 0  | 0  | 0.0000 |
| Flagellar basal body-associated protein Flil | Flil            | 3  | 4   | 0   | 0  | 1  | 0  | 4  | 0  | 1  | 2  | 0  | 1  | 0  | 0  | 0.0184 |
| Flavin containing amine oxidoreductase       | Amino_oxidase   | 18 | 28  | 35  | 7  | 10 | 14 | 11 | 16 | 17 | 17 | 23 | 23 | 15 | 25 | 0.0000 |
| FR47-like protein                            | FR47            | 10 | 11  | 11  | 7  | 5  | 15 | 15 | 7  | 13 | 15 | 23 | 16 | 17 | 23 | 0.0000 |
| Fringe-like                                  | Fringe          | 0  | 0   | 1   | 0  | 0  | 0  | 0  | 0  | 0  | 0  | 3  | 2  | 1  | 4  | 0.0307 |
| FtsJ-like methyltransferase                  | FtsJ            | 4  | 4   | 8   | 4  | 3  | 4  | 5  | 7  | 6  | 6  | 6  | 7  | 4  | 10 | 0.0000 |
| Fungal cellulose binding domain              | CBM_1           | 21 | 17  | 6   | 0  | 0  | 0  | 0  | 0  | 0  | 0  | 0  | 0  | 0  | 0  | 0.0000 |
| Fungal fucose-specific lectin                | Fungal_lectin   | 0  | 1   | 0   | 0  | 0  | 1  | 1  | 0  | 0  | 0  | 1  | 0  | 0  | 2  | 0.0184 |
| Fungal specific transcription factor domain  | Fungal_trans    | 65 | 134 | 177 | 43 | 48 | 65 | 57 | 51 | 55 | 54 | 91 | 65 | 69 | 80 | 0.0000 |
| Fungal trichothecene efflux pump (TRI12)     | TRI12           | 12 | 21  | 26  | 10 | 10 | 25 | 15 | 11 | 20 | 17 | 58 | 34 | 30 | 35 | 0.0000 |

|                                                |                 |     |     |     |     |     |     |     |     |     |     |     |     |     |     |        |
|------------------------------------------------|-----------------|-----|-----|-----|-----|-----|-----|-----|-----|-----|-----|-----|-----|-----|-----|--------|
| Fungal Zn(2)-Cys(6) binuclear cluster domain   | Zn_clus         | 99  | 186 | 246 | 52  | 55  | 104 | 92  | 60  | 95  | 83  | 133 | 107 | 101 | 115 | 0.0000 |
| GAF domain                                     | GAF             | 3   | 2   | 4   | 1   | 0   | 1   | 1   | 0   | 1   | 1   | 2   | 1   | 3   | 6   | 0.0000 |
| Glucose inhibited division protein A           | GIDA            | 7   | 10  | 11  | 3   | 2   | 6   | 6   | 6   | 4   | 5   | 26  | 30  | 19  | 37  | 0.0000 |
| Glutamine amidotransferase class-I             | GATase          | 10  | 8   | 9   | 8   | 7   | 8   | 9   | 9   | 10  | 8   | 15  | 15  | 12  | 23  | 0.0000 |
| Glutaredoxin                                   | Glutaredoxin    | 4   | 6   | 5   | 4   | 3   | 4   | 4   | 4   | 4   | 5   | 6   | 9   | 4   | 8   | 0.0307 |
| Glutathione S-transferase, C-terminal domain   | GST_C           | 10  | 17  | 17  | 6   | 7   | 11  | 14  | 10  | 8   | 8   | 15  | 16  | 13  | 19  | 0.0000 |
| Glutathione S-transferase, N-terminal domain   | GST_N           | 6   | 15  | 12  | 3   | 6   | 10  | 12  | 8   | 7   | 7   | 11  | 10  | 8   | 13  | 0.0000 |
| Glyceraldehyde 3-phosphate dehydrogenase, NA   | Gp_dh_N         | 1   | 3   | 2   | 1   | 2   | 1   | 1   | 1   | 1   | 1   | 2   | 4   | 1   | 4   | 0.0307 |
| Glycophorin A                                  | Glycophorin_A   | 0   | 0   | 0   | 0   | 0   | 0   | 0   | 0   | 0   | 0   | 2   | 0   | 0   | 1   | 0.0307 |
| Glycosyl hydrolase family 3 C terminal domai   | Glyco_hydro_3_C | 8   | 16  | 19  | 3   | 5   | 4   | 4   | 3   | 3   | 3   | 8   | 6   | 9   | 7   | 0.0000 |
| Glycosyl hydrolase family 3 N terminal domai   | Glyco_hydro_3   | 10  | 18  | 21  | 4   | 4   | 6   | 7   | 5   | 5   | 5   | 9   | 6   | 8   | 7   | 0.0000 |
| Glycosyl hydrolase family 61                   | Glyco_hydro_61  | 14  | 7   | 10  | 0   | 0   | 0   | 0   | 0   | 0   | 0   | 0   | 0   | 0   | 0   | 0.0000 |
| Glycosyl Hydrolase Family 88                   | Glyco_hydro_88  | 2   | 4   | 6   | 2   | 1   | 0   | 0   | 0   | 2   | 2   | 1   | 0   | 1   | 0   | 0.0307 |
| Glycosyl hydrolase family 92                   | Glyco_hydro_92  | 2   | 4   | 5   | 2   | 1   | 2   | 2   | 2   | 1   | 1   | 3   | 5   | 2   | 5   | 0.0184 |
| Glycosyl hydrolases family 18                  | Glyco_hydro_18  | 11  | 17  | 20  | 5   | 9   | 17  | 13  | 13  | 8   | 7   | 19  | 19  | 7   | 12  | 0.0000 |
| Glycosyl hydrolases family 2, immunoglobulin   | Glyco_hydro_2   | 4   | 2   | 8   | 1   | 0   | 0   | 0   | 1   | 0   | 0   | 2   | 1   | 1   | 2   | 0.0000 |
| Glycosyl hydrolases family 2, sugar binding    | Glyco_hydro_2_N | 3   | 5   | 9   | 0   | 1   | 2   | 2   | 2   | 0   | 0   | 2   | 1   | 1   | 2   | 0.0184 |
| Glycosyl hydrolases family 2, TIM barrel dom   | Glyco_hydro_2_C | 2   | 1   | 7   | 0   | 0   | 1   | 1   | 0   | 0   | 0   | 3   | 3   | 3   | 3   | 0.0184 |
| Glycosyl hydrolases family 28                  | Glyco_hydro_28  | 2   | 13  | 11  | 0   | 0   | 0   | 0   | 0   | 0   | 0   | 0   | 0   | 0   | 0   | 0.0000 |
| Glycosyl hydrolases family 43                  | Glyco_hydro_43  | 5   | 18  | 17  | 1   | 2   | 1   | 1   | 1   | 1   | 1   | 1   | 1   | 0   | 0   | 0.0000 |
| GMC oxidoreductase                             | GMC_oxred_N     | 10  | 13  | 27  | 9   | 9   | 5   | 4   | 6   | 6   | 6   | 6   | 10  | 9   | 7   | 0.0000 |
| GMC oxidoreductase                             | GMC_oxred_C     | 8   | 14  | 24  | 7   | 9   | 5   | 4   | 3   | 5   | 5   | 5   | 8   | 6   | 5   | 0.0000 |
| GPR1/FUN34/yaaH family                         | Gpr1_Fun34_YaaH | 1   | 1   | 6   | 2   | 2   | 2   | 2   | 2   | 2   | 3   | 4   | 4   | 1   | 4   | 0.0184 |
| GRF zinc finger                                | zf-GRF          | 2   | 1   | 0   | 1   | 0   | 1   | 1   | 2   | 3   | 2   | 2   | 4   | 2   | 5   | 0.0307 |
| GTPase of unknown function                     | MMR_HSR1        | 52  | 51  | 50  | 35  | 35  | 49  | 43  | 39  | 44  | 41  | 104 | 90  | 85  | 100 | 0.0000 |
| HEAT repeat                                    | HEAT            | 47  | 48  | 52  | 46  | 50  | 47  | 45  | 44  | 49  | 47  | 63  | 50  | 70  | 65  | 0.0307 |
| Helicase conserved C-terminal domain           | Helicase_C      | 75  | 80  | 72  | 68  | 72  | 77  | 72  | 67  | 73  | 73  | 100 | 84  | 103 | 104 | 0.0307 |
| helix-turn-helix, Psq domain                   | HTH_psq         | 1   | 30  | 0   | 2   | 1   | 2   | 0   | 1   | 0   | 3   | 1   | 2   | 1   | 1   | 0.0000 |
| Herpesvirus glycoprotein D                     | Herpes_glycop_D | 7   | 4   | 5   | 5   | 4   | 4   | 3   | 2   | 3   | 3   | 2   | 3   | 1   | 7   | 0.0000 |
| Heterokaryon incompatibility protein (HET)     | HET             | 63  | 7   | 7   | 6   | 4   | 4   | 3   | 1   | 1   | 1   | 3   | 3   | 2   | 2   | 0.0000 |
| HI0933-like protein                            | HI0933_like     | 13  | 24  | 32  | 6   | 3   | 11  | 8   | 9   | 12  | 11  | 27  | 36  | 23  | 44  | 0.0000 |
| Homeobox associated leucine zipper             | HALZ            | 0   | 2   | 1   | 1   | 4   | 3   | 3   | 0   | 3   | 3   | 5   | 3   | 1   | 3   | 0.0000 |
| Hydantoinase/oxoprolinase N-terminal region    | Hydant_A_N      | 2   | 1   | 6   | 2   | 3   | 3   | 3   | 3   | 3   | 3   | 7   | 4   | 5   | 5   | 0.0184 |
| Hydrogenase expression/synthesis hypA family   | HypA            | 0   | 1   | 0   | 0   | 1   | 0   | 0   | 0   | 1   | 1   | 4   | 1   | 0   | 1   | 0.0000 |
| Importin-beta N-terminal domain                | IBN_N           | 10  | 8   | 8   | 8   | 7   | 9   | 8   | 9   | 9   | 9   | 15  | 8   | 16  | 16  | 0.0307 |
| Integrase core domain                          | rve             | 0   | 7   | 0   | 16  | 3   | 3   | 1   | 0   | 0   | 0   | 0   | 0   | 0   | 2   | 0.0000 |
| Interferon-inducible GTPase (IIGP)             | IIGP            | 2   | 1   | 1   | 1   | 2   | 3   | 2   | 2   | 1   | 1   | 4   | 1   | 4   | 1   | 0.0184 |
| Intermediate filament protein                  | Filament        | 2   | 0   | 0   | 1   | 0   | 0   | 0   | 0   | 1   | 0   | 12  | 8   | 10  | 7   | 0.0184 |
| Intermediate filament tail domain              | IF_tail         | 0   | 0   | 0   | 0   | 0   | 0   | 0   | 0   | 0   | 0   | 0   | 0   | 0   | 4   | 0.0184 |
| Ion channel                                    | Ion_trans_2     | 2   | 3   | 0   | 1   | 0   | 1   | 1   | 1   | 0   | 0   | 0   | 1   | 1   | 0   | 0.0307 |
| KR domain                                      | KR              | 44  | 65  | 77  | 19  | 17  | 42  | 29  | 21  | 31  | 32  | 98  | 92  | 69  | 99  | 0.0000 |
| L-fucokinase                                   | Fucokinase      | 0   | 0   | 1   | 0   | 0   | 0   | 0   | 0   | 0   | 0   | 3   | 0   | 0   | 0   | 0.0450 |
| Lipopolysaccharide core biosynthesis protein ( | WaaY            | 0   | 0   | 0   | 0   | 0   | 0   | 0   | 0   | 0   | 0   | 2   | 7   | 4   | 3   | 0.0000 |
| Lipopolysaccharide kinase (Kdo/WaaP) family    | Kdo             | 6   | 6   | 4   | 5   | 10  | 8   | 14  | 8   | 10  | 13  | 46  | 66  | 62  | 68  | 0.0000 |
| Lycopene cyclase protein                       | Lycopene_cycl   | 15  | 23  | 39  | 7   | 15  | 14  | 9   | 14  | 12  | 10  | 32  | 32  | 16  | 33  | 0.0000 |
| LysM domain                                    | LysM            | 8   | 8   | 18  | 2   | 3   | 22  | 13  | 8   | 3   | 4   | 15  | 11  | 6   | 10  | 0.0000 |
| MAC/Perforin domain                            | MACPF           | 0   | 0   | 1   | 0   | 0   | 1   | 1   | 1   | 0   | 0   | 4   | 1   | 3   | 1   | 0.0184 |
| Major Facilitator Superfamily                  | MFS_1           | 167 | 325 | 406 | 118 | 134 | 187 | 168 | 152 | 164 | 156 | 226 | 167 | 166 | 177 | 0.0000 |
| Malate:quinone oxidoreductase (Mqo)            | Mqo             | 0   | 2   | 0   | 0   | 0   | 1   | 1   | 0   | 1   | 1   | 0   | 1   | 0   | 1   | 0.0307 |
| Male sterility protein                         | NAD_binding_4   | 10  | 19  | 33  | 8   | 10  | 17  | 14  | 7   | 11  | 11  | 23  | 23  | 14  | 23  | 0.0000 |
| MATH domain                                    | MATH            | 1   | 0   | 2   | 1   | 0   | 1   | 1   | 0   | 1   | 1   | 2   | 4   | 1   | 2   | 0.0307 |
| Matrixin                                       | Peptidase_M10   | 0   | 0   | 1   | 0   | 0   | 2   | 1   | 2   | 1   | 1   | 1   | 3   | 1   | 6   | 0.0000 |
| MbeD/MobD like                                 | MbeD_MobD       | 0   | 0   | 0   | 0   | 2   | 0   | 0   | 0   | 0   | 0   | 1   | 2   | 0   | 1   | 0.0000 |
| Melibiose                                      | Melibiose       | 0   | 7   | 6   | 1   | 0   | 0   | 0   | 0   | 0   | 0   | 1   | 1   | 2   | 1   | 0.0000 |
| Metallo-beta-lactamase superfamily             | Lactamase_B     | 13  | 17  | 20  | 9   | 9   | 11  | 11  | 11  | 11  | 8   | 19  | 14  | 14  | 17  | 0.0184 |
| Methionine biosynthesis protein MetW           | MetW            | 2   | 4   | 1   | 1   | 2   | 4   | 3   | 5   | 2   | 2   | 6   | 4   | 3   | 8   | 0.0000 |
| Methyltransferase domain                       | Methyltransf_11 | 67  | 56  | 68  | 40  | 46  | 72  | 68  | 47  | 57  | 55  | 87  | 75  | 67  | 80  | 0.0000 |
| Methyltransferase domain                       | Methyltransf_12 | 64  | 57  | 69  | 40  | 43  | 65  | 59  | 51  | 55  | 53  | 81  | 77  | 68  | 79  | 0.0184 |
| Methyltransferase small domain                 | MTS             | 16  | 11  | 10  | 8   | 10  | 13  | 12  | 14  | 15  | 13  | 42  | 41  | 31  | 41  | 0.0307 |
| Microtubule-binding protein MIP-T3             | MIP-T3          | 1   | 0   | 0   | 0   | 0   | 2   | 0   | 0   | 0   | 0   | 2   | 2   | 1   | 5   | 0.0307 |
| Miro-like protein                              | Miro            | 60  | 62  | 53  | 46  | 47  | 57  | 53  | 48  | 58  | 53  | 99  | 85  | 87  | 97  | 0.0184 |
| Molybdopterin oxidoreductase                   | Molybdopterin   | 1   | 2   | 3   | 1   | 3   | 1   | 1   | 2   | 1   | 1   | 4   | 4   | 2   | 6   | 0.0307 |
| Molybdopterin oxidoreductase Fe4S4 domain      | Molybdop_Fe4S4  | 0   | 0   | 1   | 0   | 0   | 0   | 0   | 0   | 0   | 0   | 1   | 0   | 0   | 3   | 0.0000 |
| Mucin-like glycoprotein                        | Mucin           | 0   | 2   | 0   | 0   | 2   | 1   | 0   | 0   | 0   | 0   | 3   | 1   | 2   | 1   | 0.0000 |
| Mur ligase family, glutamate ligase domain     | Mur_ligase_C    | 0   | 2   | 0   | 1   | 0   | 0   | 0   | 0   | 0   | 0   | 1   | 2   | 0   | 1   | 0.0307 |
| Mur ligase middle domain                       | Mur_ligase_M    | 1   | 3   | 1   | 1   | 4   | 1   | 1   | 0   | 1   | 1   | 4   | 4   | 3   | 6   | 0.0184 |
| Myb-like DNA-binding domain                    | Myb_DNA-binding | 17  | 17  | 24  | 19  | 31  | 21  | 20  | 15  | 20  | 19  | 29  | 23  | 21  | 22  | 0.0000 |
| MYND finger                                    | zf-MYND         | 6   | 3   | 3   | 2   | 4   | 7   | 5   | 3   | 5   | 4   | 2   | 7   | 7   | 10  | 0.0000 |

|                                               |                 |     |     |     |     |     |     |     |     |     |     |     |     |     |     |        |
|-----------------------------------------------|-----------------|-----|-----|-----|-----|-----|-----|-----|-----|-----|-----|-----|-----|-----|-----|--------|
| N-Acetylglucosaminyltransferase-IV (GnT-IV)   | Glyco_transf_54 | 0   | 0   | 2   | 0   | 0   | 0   | 3   | 1   | 0   | 0   | 2   | 1   | 0   | 2   | 0.0307 |
| NACHT domain                                  | NACHT           | 25  | 27  | 32  | 15  | 18  | 30  | 21  | 16  | 20  | 17  | 58  | 48  | 39  | 54  | 0.0000 |
| NAD binding domain of 6-phosphogluconate deh  | NAD_binding_2   | 7   | 9   | 10  | 3   | 5   | 7   | 7   | 5   | 6   | 7   | 22  | 18  | 12  | 19  | 0.0000 |
| NAD dependent epimerase/dehydratase family    | Epimerase       | 33  | 57  | 69  | 20  | 21  | 31  | 24  | 9   | 24  | 23  | 60  | 67  | 48  | 69  | 0.0000 |
| NAD-dependent glycerol-3-phosphate dehydroge  | NAD_Gly3P_dh_N  | 2   | 5   | 3   | 1   | 1   | 1   | 3   | 3   | 2   | 2   | 11  | 7   | 3   | 8   | 0.0000 |
| NAD(P) transhydrogenase beta subunit          | PNTB            | 1   | 1   | 1   | 1   | 2   | 1   | 1   | 1   | 1   | 1   | 2   | 5   | 0   | 3   | 0.0000 |
| NADP oxidoreductase coenzyme F420-dependent   | F420_oxidored   | 7   | 12  | 17  | 1   | 4   | 2   | 4   | 2   | 8   | 7   | 5   | 8   | 7   | 10  | 0.0000 |
| NADPH-dependent FMN reductase                 | FMN_red         | 0   | 4   | 1   | 0   | 0   | 1   | 0   | 0   | 1   | 1   | 1   | 0   | 1   | 2   | 0.0184 |
| NB-ARC domain                                 | NB-ARC          | 9   | 4   | 8   | 4   | 10  | 11  | 6   | 6   | 7   | 5   | 29  | 23  | 17  | 29  | 0.0000 |
| NmrA-like family                              | NmrA            | 15  | 29  | 39  | 8   | 10  | 10  | 11  | 11  | 13  | 14  | 29  | 30  | 23  | 27  | 0.0000 |
| NNMT/PNMT/TEMT family                         | NNMT_PNMT_TEMT  | 1   | 3   | 0   | 0   | 4   | 1   | 1   | 0   | 0   | 0   | 2   | 2   | 2   | 2   | 0.0000 |
| Nuclear RNA-splicing-associated protein       | SR-25           | 2   | 0   | 1   | 1   | 3   | 0   | 0   | 1   | 1   | 1   | 4   | 1   | 0   | 3   | 0.0000 |
| Nucleoplasm                                   | Nucleoplasm     | 0   | 0   | 0   | 1   | 0   | 0   | 0   | 0   | 0   | 0   | 1   | 0   | 4   | 1   | 0.0184 |
| O-methyltransferase                           | Methyltransf_2  | 7   | 10  | 16  | 2   | 2   | 9   | 12  | 4   | 6   | 6   | 9   | 8   | 6   | 7   | 0.0184 |
| Outer membrane protein (OmpH-like)            | OmpH            | 1   | 1   | 0   | 2   | 1   | 0   | 0   | 1   | 0   | 0   | 2   | 0   | 0   | 4   | 0.0000 |
| Oxidoreductase family, NAD-binding Rossmann   | GFO_IDH_MocA    | 7   | 12  | 19  | 5   | 5   | 7   | 7   | 4   | 4   | 4   | 11  | 9   | 6   | 7   | 0.0184 |
| PAN-like domain                               | PAN_2           | 0   | 1   | 0   | 0   | 0   | 0   | 0   | 0   | 0   | 0   | 0   | 0   | 4   | 0   | 0.0184 |
| PAS fold                                      | PAS             | 8   | 3   | 3   | 4   | 2   | 1   | 1   | 0   | 2   | 3   | 5   | 5   | 1   | 4   | 0.0307 |
| PBS lyase HEAT-like repeat                    | HEAT_PBS        | 3   | 3   | 5   | 3   | 8   | 2   | 2   | 1   | 4   | 4   | 8   | 4   | 7   | 12  | 0.0000 |
| PcrB family                                   | PcrB            | 1   | 0   | 0   | 0   | 1   | 0   | 0   | 0   | 0   | 0   | 1   | 1   | 0   | 3   | 0.0450 |
| Peptidase C26                                 | Peptidase_C26   | 4   | 6   | 5   | 4   | 5   | 5   | 5   | 5   | 7   | 6   | 10  | 13  | 9   | 20  | 0.0000 |
| Peptidase family S64                          | Peptidase_S64   | 0   | 0   | 0   | 0   | 0   | 0   | 2   | 1   | 0   | 0   | 2   | 0   | 1   | 5   | 0.0000 |
| Permease for cytosine/purines, uracil, thiam  | Transp_cyt_pur  | 3   | 5   | 12  | 5   | 2   | 7   | 6   | 4   | 4   | 4   | 7   | 3   | 4   | 4   | 0.0000 |
| Phosphopantetheine attachment site            | PP-binding      | 9   | 34  | 42  | 8   | 11  | 30  | 27  | 17  | 17  | 19  | 35  | 32  | 19  | 30  | 0.0000 |
| Phosphorylase superfamily                     | PNP_UDP_1       | 4   | 10  | 24  | 5   | 6   | 2   | 2   | 1   | 3   | 3   | 4   | 3   | 4   | 2   | 0.0000 |
| Phosphotransferase enzyme family              | APH             | 33  | 47  | 36  | 40  | 98  | 99  | 104 | 122 | 115 | 113 | 140 | 258 | 204 | 226 | 0.0000 |
| Phytanoyl-CoA dioxygenase (PhyH)              | PhyH            | 4   | 10  | 19  | 3   | 3   | 7   | 4   | 5   | 5   | 5   | 4   | 3   | 4   | 4   | 0.0000 |
| Plant protein of unknown function (DUF869)    | DUF869          | 0   | 0   | 0   | 0   | 0   | 0   | 0   | 0   | 0   | 0   | 0   | 4   | 1   | 1   | 0.0184 |
| Polysaccharide biosynthesis protein           | Polysacc_synt_2 | 3   | 5   | 6   | 0   | 2   | 1   | 2   | 1   | 1   | 1   | 20  | 16  | 11  | 20  | 0.0000 |
| Poxvirus virion envelope protein A14          | Pox_A14         | 0   | 0   | 0   | 0   | 0   | 0   | 0   | 0   | 0   | 0   | 4   | 0   | 2   | 0   | 0.0000 |
| PPR repeat                                    | PPR             | 10  | 9   | 16  | 8   | 12  | 12  | 11  | 10  | 10  | 11  | 16  | 15  | 17  | 12  | 0.0000 |
| Predicted membrane protein (DUF2207)          | DUF2207         | 0   | 1   | 0   | 0   | 0   | 0   | 1   | 1   | 0   | 0   | 4   | 0   | 0   | 1   | 0.0000 |
| Predicted membrane protein (DUF2306)          | DUF2306         | 0   | 0   | 0   | 0   | 0   | 2   | 2   | 0   | 0   | 0   | 2   | 1   | 0   | 3   | 0.0184 |
| Prenyltransferase and squalene oxidase repea  | Prenyltrans     | 5   | 10  | 9   | 4   | 5   | 5   | 4   | 4   | 5   | 6   | 8   | 6   | 5   | 9   | 0.0450 |
| PrkA AAA domain                               | AAA_PrkA        | 0   | 2   | 1   | 0   | 0   | 0   | 0   | 0   | 0   | 0   | 3   | 1   | 3   | 1   | 0.0184 |
| Prolyl oligopeptidase family                  | Peptidase_S9    | 10  | 15  | 21  | 5   | 6   | 7   | 8   | 9   | 10  | 9   | 25  | 22  | 29  | 24  | 0.0000 |
| Protein kinase domain                         | Pkinase         | 107 | 114 | 104 | 111 | 152 | 139 | 144 | 165 | 153 | 146 | 214 | 299 | 260 | 306 | 0.0000 |
| Protein of unknown function (DUF1112)         | DUF1112         | 0   | 0   | 0   | 0   | 0   | 0   | 0   | 0   | 0   | 0   | 2   | 0   | 0   | 1   | 0.0307 |
| Protein of unknown function (DUF1155)         | DUF1155         | 0   | 0   | 1   | 0   | 0   | 0   | 0   | 0   | 0   | 0   | 0   | 1   | 0   | 2   | 0.0184 |
| Protein of unknown function (DUF1515)         | DUF1515         | 0   | 0   | 0   | 0   | 0   | 0   | 0   | 0   | 0   | 0   | 1   | 0   | 0   | 2   | 0.0307 |
| Protein of unknown function (DUF1664)         | DUF1664         | 0   | 1   | 1   | 0   | 1   | 0   | 0   | 0   | 0   | 0   | 2   | 3   | 4   | 0   | 0.0000 |
| Protein of unknown function (DUF1679)         | DUF1679         | 0   | 0   | 0   | 0   | 1   | 2   | 3   | 2   | 0   | 1   | 2   | 13  | 12  | 7   | 0.0000 |
| Protein of unknown function (DUF2029)         | DUF2029         | 0   | 0   | 0   | 0   | 0   | 0   | 0   | 0   | 0   | 1   | 1   | 0   | 2   | 0   | 0.0307 |
| Protein of unknown function (DUF342)          | DUF342          | 0   | 0   | 2   | 0   | 1   | 1   | 0   | 0   | 0   | 0   | 0   | 1   | 0   | 1   | 0.0184 |
| Protein of unknown function (DUF904)          | DUF904          | 2   | 0   | 3   | 0   | 0   | 0   | 1   | 0   | 1   | 2   | 1   | 6   | 1   | 4   | 0.0000 |
| Protein of unknown function (DUF972)          | DUF972          | 2   | 1   | 1   | 0   | 1   | 1   | 0   | 0   | 1   | 1   | 0   | 3   | 1   | 2   | 0.0184 |
| Protein of unknown function, DUF258           | DUF258          | 20  | 21  | 29  | 14  | 16  | 21  | 15  | 12  | 20  | 16  | 77  | 65  | 62  | 71  | 0.0000 |
| Protein tyrosine kinase                       | Pkinase_Tyr     | 80  | 81  | 82  | 78  | 79  | 82  | 85  | 93  | 99  | 91  | 178 | 244 | 222 | 268 | 0.0000 |
| Protein-L-isoaspartate(D-aspartate) O-methyl  | PCMT            | 2   | 7   | 6   | 1   | 1   | 3   | 3   | 4   | 3   | 3   | 18  | 17  | 13  | 21  | 0.0000 |
| Proteins of unknown function (DUF2006)        | DUF2006         | 0   | 0   | 5   | 0   | 0   | 0   | 0   | 0   | 0   | 0   | 0   | 1   | 0   | 1   | 0.0000 |
| Putative ATPase subunit of terminase (gpp-lik | Terminase_5     | 0   | 0   | 0   | 0   | 0   | 0   | 0   | 0   | 0   | 0   | 3   | 0   | 0   | 1   | 0.0184 |
| Putative esterase                             | Esterase        | 6   | 4   | 5   | 4   | 2   | 4   | 4   | 3   | 3   | 4   | 6   | 9   | 6   | 13  | 0.0000 |
| Putative serine esterase (DUF676)             | DUF676          | 7   | 4   | 3   | 2   | 1   | 2   | 2   | 2   | 1   | 1   | 10  | 7   | 8   | 12  | 0.0307 |
| Pyridine nucleotide-disulphide oxidoreductas  | Pyr_redox       | 30  | 41  | 59  | 21  | 20  | 25  | 21  | 27  | 28  | 30  | 65  | 53  | 42  | 66  | 0.0000 |
| Pyridine nucleotide-disulphide oxidoreductas  | Pyr_redox_2     | 69  | 87  | 127 | 40  | 35  | 59  | 51  | 53  | 54  | 52  | 90  | 82  | 69  | 99  | 0.0000 |
| Pyridoxal-phosphate dependent enzyme          | PALP            | 11  | 13  | 14  | 9   | 9   | 13  | 13  | 9   | 12  | 12  | 18  | 18  | 12  | 20  | 0.0184 |
| Pyridoxamine 5'-phosphate oxidase             | Pyridox_oxidase | 4   | 6   | 3   | 3   | 1   | 4   | 3   | 4   | 4   | 3   | 6   | 3   | 7   | 5   | 0.0184 |
| Rab5 binding                                  | Rab5-bind       | 1   | 0   | 3   | 0   | 1   | 0   | 0   | 0   | 0   | 0   | 0   | 4   | 1   | 2   | 0.0000 |
| Rad50 zinc hook motif                         | Rad50_zn_hook   | 2   | 0   | 0   | 0   | 1   | 0   | 0   | 0   | 0   | 0   | 1   | 3   | 0   | 1   | 0.0307 |
| RecF/RecN/SMC N terminal domain               | SMC_N           | 17  | 11  | 12  | 9   | 9   | 12  | 11  | 10  | 13  | 13  | 114 | 91  | 91  | 99  | 0.0000 |
| Reovirus sigma C capsid protein               | Reo_sigmaC      | 0   | 0   | 0   | 0   | 0   | 0   | 0   | 0   | 0   | 1   | 21  | 8   | 14  | 19  | 0.0000 |
| Response regulator receiver domain            | Response_reg    | 14  | 16  | 19  | 9   | 6   | 7   | 7   | 9   | 9   | 9   | 14  | 11  | 11  | 17  | 0.0000 |
| Reverse transcriptase (RNA-dependent DNA pol  | RVT_2           | 0   | 0   | 2   | 3   | 0   | 0   | 0   | 0   | 0   | 1   | 0   | 5   | 0   | 0   | 0.0000 |
| Reverse transcriptase (RNA-dependent DNA pol  | RVT_1           | 1   | 26  | 2   | 2   | 6   | 4   | 1   | 4   | 1   | 3   | 3   | 4   | 4   | 4   | 0.0000 |
| Ribosomal RNA adenine dimethylase             | RrnaAD          | 5   | 4   | 6   | 2   | 1   | 3   | 3   | 4   | 3   | 3   | 12  | 8   | 4   | 13  | 0.0000 |
| RIM-binding protein of the cytomatrix active  | Cast            | 0   | 1   | 0   | 0   | 0   | 2   | 2   | 0   | 1   | 1   | 0   | 0   | 3   | 0   | 0.0307 |
| RIO1 family                                   | RIO1            | 3   | 2   | 2   | 2   | 2   | 4   | 4   | 6   | 4   | 4   | 14  | 27  | 26  | 31  | 0.0000 |
| RNA binding motif                             | RRM_3           | 1   | 0   | 2   | 0   | 1   | 1   | 0   | 2   | 0   | 0   | 3   | 6   | 3   | 7   | 0.0000 |
| RNA polymerase III subunit RPC82              | RNA_pol_Rpc82   | 1   | 1   | 1   | 1   | 1   | 1   | 1   | 1   | 1   | 1   | 3   | 1   | 0   | 4   | 0.0184 |

|                                              |                 |     |     |     |     |     |     |     |     |     |     |     |     |     |     |        |
|----------------------------------------------|-----------------|-----|-----|-----|-----|-----|-----|-----|-----|-----|-----|-----|-----|-----|-----|--------|
| RNase H                                      | RnaseH          | 3   | 19  | 1   | 3   | 2   | 3   | 4   | 2   | 2   | 2   | 2   | 2   | 2   | 4   | 0.0000 |
| Roadblock/LC7 domain                         | Robl_LC7        | 1   | 2   | 2   | 1   | 0   | 1   | 1   | 0   | 1   | 1   | 2   | 0   | 0   | 1   | 0.0307 |
| RTA1 like protein                            | RTA1            | 6   | 21  | 16  | 4   | 6   | 10  | 10  | 8   | 7   | 7   | 11  | 7   | 7   | 16  | 0.0000 |
| S-antigen protein                            | S-antigen       | 0   | 0   | 0   | 0   | 0   | 0   | 0   | 0   | 0   | 0   | 2   | 0   | 1   | 4   | 0.0000 |
| Saccharopine dehydrogenase                   | Saccharop_dh    | 15  | 19  | 23  | 3   | 5   | 8   | 8   | 9   | 8   | 9   | 17  | 21  | 15  | 19  | 0.0000 |
| Secretory lipase                             | LIP             | 1   | 3   | 4   | 0   | 1   | 2   | 2   | 2   | 1   | 1   | 2   | 5   | 5   | 4   | 0.0450 |
| Semialdehyde dehydrogenase, NAD binding doma | Semialhyde_dh   | 3   | 4   | 11  | 4   | 5   | 3   | 3   | 3   | 4   | 4   | 10  | 7   | 8   | 8   | 0.0307 |
| Sensors of blue-light using FAD              | BLUF            | 0   | 0   | 0   | 0   | 0   | 0   | 0   | 0   | 1   | 1   | 0   | 2   | 2   | 0   | 0.0000 |
| Septation ring formation regulator, EzrA     | EzrA            | 0   | 0   | 0   | 0   | 0   | 0   | 0   | 0   | 0   | 0   | 1   | 3   | 0   | 2   | 0.0184 |
| Septum formation initiator                   | DivIC           | 4   | 1   | 1   | 0   | 5   | 3   | 2   | 4   | 5   | 6   | 2   | 7   | 3   | 4   | 0.0000 |
| Serine carboxypeptidase                      | Peptidase_S10   | 4   | 11  | 5   | 5   | 5   | 11  | 11  | 7   | 10  | 10  | 14  | 8   | 11  | 12  | 0.0000 |
| Serine-threonine phosphatase 2A subunit B al | PP2A_B_N        | 5   | 1   | 1   | 2   | 1   | 3   | 0   | 1   | 1   | 1   | 17  | 12  | 13  | 9   | 0.0184 |
| Shikimate / quinate 5-dehydrogenase          | Shikimate_DH    | 13  | 16  | 16  | 5   | 4   | 5   | 7   | 7   | 5   | 4   | 26  | 29  | 20  | 30  | 0.0000 |
| SHNI-TPR                                     | SHNI-TPR        | 2   | 4   | 5   | 1   | 2   | 3   | 2   | 2   | 3   | 3   | 5   | 2   | 2   | 4   | 0.0184 |
| short chain dehydrogenase                    | adh_short       | 68  | 125 | 165 | 50  | 44  | 78  | 59  | 54  | 68  | 68  | 116 | 118 | 85  | 125 | 0.0000 |
| Sigma-70, region 4                           | Sigma70_r4      | 0   | 0   | 0   | 0   | 0   | 0   | 0   | 0   | 1   | 1   | 1   | 0   | 0   | 2   | 0.0307 |
| SRR1                                         | SRR1            | 0   | 1   | 0   | 2   | 1   | 1   | 1   | 1   | 1   | 1   | 0   | 1   | 0   | 2   | 0.0307 |
| Subtilase family                             | Peptidase_S8    | 10  | 6   | 3   | 5   | 8   | 16  | 18  | 19  | 18  | 19  | 31  | 22  | 25  | 30  | 0.0000 |
| Sugar (and other) transporter                | Sugar_tr        | 77  | 145 | 181 | 54  | 50  | 75  | 71  | 62  | 70  | 70  | 95  | 78  | 83  | 88  | 0.0000 |
| Sulfatase                                    | Sulfatase       | 6   | 8   | 10  | 5   | 4   | 6   | 6   | 9   | 6   | 6   | 13  | 9   | 8   | 13  | 0.0184 |
| Tannase and feruloyl esterase                | Tannase         | 1   | 5   | 9   | 0   | 0   | 2   | 2   | 0   | 0   | 0   | 0   | 0   | 0   | 0   | 0.0307 |
| TAP-like protein                             | Abhydrolase_4   | 1   | 1   | 3   | 0   | 0   | 2   | 2   | 2   | 0   | 0   | 3   | 1   | 4   | 1   | 0.0000 |
| Taurine catabolism dioxygenase TauD, TfdA fa | TauD            | 13  | 14  | 21  | 3   | 2   | 4   | 4   | 5   | 5   | 5   | 6   | 5   | 6   | 6   | 0.0000 |
| Tellurite resistance protein TehB            | TehB            | 1   | 0   | 1   | 0   | 0   | 1   | 1   | 1   | 1   | 1   | 5   | 0   | 3   | 3   | 0.0000 |
| Tetratricopeptide repeat                     | TPR_4           | 4   | 6   | 18  | 4   | 6   | 8   | 5   | 5   | 8   | 8   | 11  | 6   | 10  | 15  | 0.0000 |
| Tetratricopeptide repeat                     | TPR_2           | 47  | 54  | 68  | 42  | 48  | 55  | 49  | 42  | 48  | 47  | 61  | 62  | 47  | 64  | 0.0000 |
| Tetratricopeptide repeat                     | TPR_1           | 42  | 45  | 59  | 36  | 36  | 46  | 42  | 33  | 40  | 37  | 54  | 55  | 42  | 56  | 0.0000 |
| Tetratricopeptide repeat                     | TPR_3           | 4   | 2   | 11  | 1   | 4   | 3   | 2   | 2   | 3   | 3   | 2   | 5   | 6   | 3   | 0.0000 |
| TFIIE alpha subunit                          | TFIIE_alpha     | 1   | 1   | 1   | 1   | 1   | 1   | 1   | 1   | 1   | 1   | 6   | 2   | 1   | 5   | 0.0000 |
| Thi4 family                                  | Thi4            | 22  | 33  | 35  | 14  | 10  | 15  | 8   | 12  | 14  | 15  | 33  | 44  | 28  | 51  | 0.0000 |
| Thiamine pyrophosphate enzyme, C-terminal TP | TPP_enzyme_C    | 5   | 7   | 7   | 5   | 5   | 6   | 6   | 6   | 7   | 7   | 18  | 11  | 9   | 20  | 0.0000 |
| Thiamine pyrophosphate enzyme, central domai | TPP_enzyme_M    | 8   | 8   | 7   | 6   | 6   | 7   | 5   | 6   | 7   | 7   | 13  | 9   | 9   | 16  | 0.0000 |
| Thiamine pyrophosphate enzyme, N-terminal TP | TPP_enzyme_N    | 5   | 6   | 6   | 5   | 5   | 5   | 5   | 4   | 6   | 6   | 12  | 6   | 6   | 13  | 0.0000 |
| ThiF family                                  | ThiF            | 9   | 9   | 8   | 8   | 9   | 8   | 8   | 8   | 8   | 7   | 14  | 9   | 8   | 14  | 0.0000 |
| Thiolase, C-terminal domain                  | Thiolase_C      | 6   | 7   | 8   | 6   | 8   | 5   | 5   | 7   | 6   | 6   | 10  | 13  | 10  | 18  | 0.0000 |
| Thiolase, N-terminal domain                  | Thiolase_N      | 9   | 14  | 21  | 9   | 6   | 18  | 11  | 9   | 12  | 12  | 31  | 29  | 17  | 36  | 0.0000 |
| Transferase family                           | Transferase     | 1   | 6   | 7   | 1   | 0   | 4   | 1   | 2   | 1   | 1   | 5   | 4   | 3   | 2   | 0.0307 |
| Transforming acidic coiled-coil-containing p | TACC            | 0   | 0   | 0   | 1   | 0   | 0   | 0   | 0   | 0   | 0   | 0   | 2   | 0   | 1   | 0.0184 |
| Transketolase, C-terminal domain             | Transketolase_C | 4   | 3   | 6   | 4   | 3   | 4   | 3   | 3   | 3   | 3   | 5   | 10  | 4   | 11  | 0.0000 |
| Transketolase, pyrimidine binding domain     | Transket_pyr    | 4   | 5   | 6   | 4   | 4   | 4   | 4   | 4   | 4   | 4   | 5   | 12  | 5   | 13  | 0.0000 |
| Transketolase, thiamine diphosphate binding  | Transketolase_N | 1   | 2   | 4   | 1   | 1   | 1   | 1   | 1   | 1   | 1   | 3   | 5   | 1   | 6   | 0.0000 |
| Transmembrane protein                        | Macoillin       | 0   | 0   | 0   | 0   | 0   | 0   | 0   | 0   | 0   | 0   | 5   | 3   | 6   | 2   | 0.0184 |
| Transposase                                  | Transposase_8   | 1   | 16  | 1   | 1   | 0   | 0   | 0   | 0   | 0   | 0   | 2   | 1   | 0   | 2   | 0.0000 |
| TrkA-N domain                                | TrkA_N          | 4   | 12  | 13  | 3   | 5   | 9   | 7   | 4   | 9   | 8   | 10  | 8   | 7   | 16  | 0.0000 |
| tRNA methyl transferase                      | tRNA_Me_trans   | 1   | 1   | 0   | 1   | 0   | 1   | 1   | 0   | 0   | 0   | 5   | 4   | 1   | 5   | 0.0000 |
| Tryptophan halogenase                        | Trp_halogenase  | 0   | 1   | 10  | 0   | 1   | 3   | 3   | 1   | 0   | 0   | 9   | 7   | 7   | 11  | 0.0000 |
| Type I phosphodiesterase / nucleotide pyroph | Phosphodiect    | 6   | 7   | 10  | 7   | 8   | 8   | 7   | 9   | 8   | 8   | 13  | 9   | 7   | 13  | 0.0000 |
| Type III restriction enzyme, res subunit     | ResIII          | 21  | 23  | 20  | 22  | 19  | 22  | 23  | 19  | 19  | 19  | 79  | 62  | 70  | 84  | 0.0000 |
| UbiA prenyltransferase family                | UbiA            | 3   | 7   | 5   | 2   | 0   | 2   | 2   | 2   | 2   | 2   | 5   | 2   | 2   | 2   | 0.0184 |
| UDP-glucose/GDP-mannose dehydrogenase family | UDPG_MGDP_dh_N  | 3   | 4   | 1   | 1   | 1   | 1   | 1   | 0   | 0   | 0   | 4   | 5   | 3   | 8   | 0.0000 |
| Uncharacterised conserved protein (DUF2305)  | DUF2305         | 3   | 2   | 1   | 1   | 1   | 1   | 2   | 1   | 1   | 1   | 8   | 5   | 8   | 4   | 0.0307 |
| Vacuolar sorting protein 39 domain 1         | Vps39_1         | 1   | 1   | 1   | 1   | 2   | 1   | 1   | 1   | 1   | 1   | 5   | 1   | 1   | 8   | 0.0000 |
| Viral (Superfamily 1) RNA helicase           | Viral_helicase1 | 2   | 2   | 2   | 3   | 2   | 3   | 3   | 2   | 6   | 6   | 27  | 16  | 22  | 25  | 0.0000 |
| WD domain, G-beta repeat                     | WD40            | 111 | 116 | 121 | 110 | 113 | 116 | 113 | 110 | 109 | 109 | 161 | 126 | 146 | 152 | 0.0000 |
| Xylose isomerase-like TIM barrel             | AP_endonuc_2    | 6   | 7   | 7   | 3   | 4   | 2   | 2   | 4   | 4   | 5   | 4   | 6   | 3   | 8   | 0.0184 |
| Zinc finger, C2H2 type                       | zf-C2H2         | 53  | 51  | 55  | 42  | 49  | 41  | 45  | 41  | 58  | 48  | 61  | 46  | 46  | 53  | 0.0184 |
| Zinc finger, C3HC4 type (RING finger)        | zf-C3HC4        | 36  | 35  | 34  | 29  | 29  | 31  | 34  | 30  | 38  | 37  | 54  | 38  | 48  | 48  | 0.0000 |
| Zinc knuckle                                 | zf-CCHC         | 11  | 7   | 9   | 23  | 9   | 8   | 7   | 7   | 10  | 17  | 7   | 8   | 8   | 9   | 0.0000 |
| Zinc-binding dehydrogenase                   | ADH_zinc_N      | 40  | 70  | 90  | 33  | 29  | 36  | 33  | 35  | 33  | 34  | 70  | 58  | 55  | 75  | 0.0000 |

\*Reported tree-wide p-values were corrected for multiple hypothesis testing using the Benjamini-Hochberg false discovery rate method.
