# Supplementary material for: Comparative Phylogenomics of Pathogenic and Nonpathogenic Species
Source: Oxford University Press journal article supplement (doi:10.1534/g3.115.022806), 2015-12-03
Supplement: 022806_tables2.pdf [file 022806_tables2.pdf]

**Table S2.** Summary of genes showing evidence of positive selection by the Branch Site REL test (KOSAKOVSKY POND *et al.* 2011).

| ID         | Gene                                                                          | p-value * | Expression ** |
|------------|-------------------------------------------------------------------------------|-----------|---------------|
| CIMG_00040 | Conserved hypothetical protein (DUF2235)                                      | 0.005451  | -             |
| CIMG_00251 | Ulp1 protease family protein                                                  | 0.013855  | -             |
| CIMG_00329 | Nuclear cohesin complex subunit                                               | 0.015047  | upH           |
| CIMG_00547 | RNA methyltransferase, TrmH family, group 3                                   | 0.036719  | -             |
| CIMG_00591 | COP9 signalosome complex subunit 7a                                           | 0.002332  | -             |
| CIMG_00809 | High-affinity nickel transporter (DNA polymerase lambda)                      | 0.000027  | -             |
| CIMG_00815 | High-affinity nickel transporter nic1                                         | 0.034231  | upS           |
| CIMG_01135 | GIN5 DNA replication complex subunit Sld5                                     | 0.036659  | -             |
| CIMG_01175 | Asparaginase                                                                  | 0.019608  | -             |
| CIMG_01214 | Conserved hypothetical protein                                                | 0.010919  | upS           |
| CIMG_01394 | Subtilisin-like protease                                                      | 0.000976  | -             |
| CIMG_01420 | Mechanosensitive ion channel family protein                                   | 0.000396  | -             |
| CIMG_01426 | Gamma-butyrobetaine hydroxylase subfamily                                     | 0.014706  | upH           |
| CIMG_01507 | Conserved hypothetical protein                                                | 0.006346  | upH           |
| CIMG_01625 | Formamidopyrimidine-DNA glycosylase                                           | 0.000561  | -             |
| CIMG_01643 | RNA methylase                                                                 | 0.004439  | -             |
| CIMG_01661 | Conserved hypothetical protein (putative autophagy regulatory protein Atg2)   | 0.024921  | upH           |
| CIMG_01785 | Conserved hypothetical protein                                                | 0.037151  | -             |
| CIMG_01987 | Conserved hypothetical protein (DUF2467, C2H2 type zinc finger)               | 0.043760  | upH           |
| CIMG_02041 | RNA binding protein Rnp24                                                     | 0.031928  | -             |
| CIMG_02219 | Conserved hypothetical protein (C2H2 type zinc finger)                        | 0.010849  | -             |
| CIMG_02259 | Conserved hypothetical protein (DUF2403, DUF2401)                             | 0.000192  | upH           |
| CIMG_02333 | Nucleolin                                                                     | 0.031243  | -             |
| CIMG_02376 | Conserved hypothetical protein                                                | 0.000168  | upS           |
| CIMG_02498 | Conserved hypothetical protein                                                | 0.014301  | upS           |
| CIMG_02797 | Mitochondrial mRNA processing protein PET127                                  | 0.019366  | upS           |
| CIMG_02871 | Phosphoglycerate mutase                                                       | 0.033470  | -             |
| CIMG_02984 | TCTP family protein                                                           | 0.001607  | -             |
| CIMG_03196 | TGF beta receptor associated protein 1                                        | 0.003769  | -             |
| CIMG_03224 | dsDNA-dependent ATPase                                                        | 0.013072  | -             |
| CIMG_03322 | Conserved hypothetical protein (F-box domain)                                 | 0.016531  | upH           |
| CIMG_03340 | DEAD box RNA helicase HelA                                                    | 0.003518  | -             |
| CIMG_03363 | Transcription initiation protein SPT3                                         | 0.049659  | -             |
| CIMG_03489 | Aldose 1-epimerase                                                            | 0.002085  | upH           |
| CIMG_03508 | Nucleolar protein NOP58                                                       | 0.008107  | -             |
| CIMG_03719 | Compass component spp1                                                        | 0.013394  | -             |
| CIMG_03786 | Conserved hypothetical protein                                                | 0.000020  | upH           |
| CIMG_03788 | STE/STE11/BCK1 protein kinase                                                 | 0.000629  | -             |
| CIMG_03998 | Vacuolar protein sorting-associated protein 74                                | 0.034655  | upS           |
| CIMG_04059 | Endosomal cargo receptor                                                      | 0.020312  | -             |
| CIMG_04060 | SWRI-complex protein 4                                                        | 0.028010  | -             |
| CIMG_04097 | Conserved hypothetical protein (Tat pathway signal sequence)                  | 0.010805  | -             |
| CIMG_04470 | Membrane bound C2 domain-containing protein                                   | 0.002063  | upH           |
| CIMG_04486 | Peptidyl-prolyl cis-trans isomerase                                           | 0.000194  | -             |
| CIMG_04533 | Conserved hypothetical protein (MIZ/SP-RING zinc finger)                      | 0.002411  | -             |
| CIMG_04547 | Structure-specific endonuclease subunit SLX4                                  | 0.012354  | -             |
| CIMG_04822 | DNA topoisomerase I                                                           | 0.034456  | -             |
| CIMG_04974 | Conserved hypothetical protein (SRP40, C-terminal domain)                     | 0.000005  | -             |
| CIMG_05122 | Conserved hypothetical protein (PAPA-1-like conserved region)                 | 0.000248  | upS           |
| CIMG_05165 | Urease accessory protein UreG                                                 | 0.019367  | -             |
| CIMG_05245 | Thiamine pyrophosphokinase                                                    | 0.020864  | -             |
| CIMG_05288 | Conserved hypothetical protein                                                | 0.004166  | upS           |
| CIMG_05421 | Beta-glucan synthesis-associated protein SKN1                                 | 0.017344  | -             |
| CIMG_05496 | DNA polymerase epsilon subunit C                                              | 0.024757  | -             |
| CIMG_05542 | Phosphoglycerate mutase                                                       | 0.022010  | upS           |
| CIMG_05620 | Conserved hypothetical protein                                                | 0.023260  | upH           |
| CIMG_05640 | Isochorismatase family protein                                                | 0.004831  | -             |
| CIMG_05876 | G1/S-specific cyclin Pcl5                                                     | 0.001300  | -             |
| CIMG_05901 | Proline permease                                                              | 0.012280  | -             |
| CIMG_06294 | Conserved hypothetical protein (Glutathione-dependent formaldehyde-activating | 0.013024  | upS           |

|            |                                                                   |          |     |
|------------|-------------------------------------------------------------------|----------|-----|
| CIMG_06361 | Class V myosin                                                    | 0.001249 | -   |
| CIMG_06502 | Conserved hypothetical protein                                    | 0.007543 | upH |
| CIMG_06553 | Putative SH3 domain protein Cyk3                                  | 0.021649 | upH |
| CIMG_06582 | Phosphatidylinositol transfer protein SFH5                        | 0.017966 | upH |
| CIMG_06731 | Conserved hypothetical protein                                    | 0.006763 | -   |
| CIMG_06955 | Histone-lysine N-methyltransferase Clr4                           | 0.046382 | -   |
| CIMG_06994 | Cu-Zn superoxide dismutase                                        | 0.011593 | -   |
| CIMG_07095 | NADH:ubiquinone oxidoreductase subunit                            | 0.009568 | -   |
| CIMG_07110 | Conserved hypothetical protein                                    | 0.026909 | -   |
| CIMG_07139 | Protein phosphatase 2C                                            | 0.026973 | -   |
| CIMG_07513 | Conserved hypothetical protein                                    | 0.029460 | -   |
| CIMG_07608 | Conserved hypothetical protein                                    | 0.036740 | upS |
| CIMG_07629 | Leucine aminopeptidase 1                                          | 0.006461 | -   |
| CIMG_07728 | Conserved hypothetical protein                                    | 0.012348 | -   |
| CIMG_07814 | DNA-directed RNA polymerase II polypeptide                        | 0.042025 | -   |
| CIMG_07846 | Conserved hypothetical protein                                    | 0.004436 | -   |
| CIMG_08085 | Conserved hypothetical protein                                    | 0.025896 | upS |
| CIMG_08095 | Conserved hypothetical protein                                    | 0.033971 | -   |
| CIMG_08300 | Phospholipase B                                                   | 0.035882 | -   |
| CIMG_08779 | Conserved hypothetical protein (Putative methyltransferase)       | 0.022801 | upS |
| CIMG_08791 | Conserved hypothetical protein                                    | 0.000328 | -   |
| CIMG_08827 | Conserved hypothetical protein                                    | 0.013534 | upH |
| CIMG_08892 | bZIP transcription factor                                         | 0.000129 | upH |
| CIMG_08965 | Conserved hypothetical protein (homeobox domain)                  | 0.000013 | -   |
| CIMG_09023 | Nuclear and cytoplasmic polyadenylated RNA-binding protein (pub1) | 0.049048 | upH |
| CIMG_09059 | Serine palmitoyltransferase 2                                     | 0.000257 | upS |
| CIMG_09408 | Conserved hypothetical protein                                    | 0.020192 | upS |
| CIMG_09449 | ATPase synthesis protein 25                                       | 0.017249 | -   |
| CIMG_09551 | 60S ribosome biogenesis protein Mak11                             | 0.036159 | -   |
| CIMG_09625 | Conserved hypothetical protein (Transcription factor Pcc1)        | 0.033747 | upH |
| CIMG_09696 | Proline-rich antigen                                              | 0.011392 | -   |
| CIMG_09789 | Conserved hypothetical protein (CS domain)                        | 0.023226 | -   |
| CIMG_09801 | 1,3-beta-glucanosyltransferase                                    | 0.042396 | -   |
| CIMG_10180 | Pheromone-dependent cell cycle arrest protein Far11               | 0.019899 | upS |
| CIMG_10184 | RING finger protein                                               | 0.036435 | -   |
| CIMG_10236 | Mismatch-specific thymine-DNA glycosylase                         | 0.019565 | upS |
| CIMG_11422 | C2H2 transcription factor                                         | 0.023987 | upS |
| CIMG_11441 | Ubiquitin-protein ligase                                          | 0.008829 | -   |
| CIMG_11666 | Carboxypeptidase S1                                               | 0.014534 | upH |
| CIMG_11667 | Polymerase                                                        | 0.034746 | upH |
| CIMG_12068 | Multicopper oxidase                                               | 0.028114 | upS |
| CIMG_13167 | Beta-glucosidase5                                                 | 0.014984 | upH |
| CIMG_13734 | Glutaredoxin                                                      | 0.003492 | -   |

\* Reported p-values were corrected for multiple hypothesis testing using the Bonferroni method.

\*\* Previously reported expression differences (WHISTON *et al.* 2012) indicated at up-regulated in saprobic hyphae (upH), up-regulated in parasitic spherules (upS) or no reported expression difference (-).
